# Supplementary material for: The positivity rate of 68Gallium-PSMA-11 ligand PET/CT depends on the serum PSA-value in patients with biochemical recurrence of prostate cancer
Source: PubMed Central journal article supplement (PMC6817454; doi:10.18632/oncotarget.27239), 2019-10-22
Supplement: oncotarget-10-6124-s001.pdf [file oncotarget-10-6124-s001.pdf]

## **The positivity rate of 68Gallium-PSMA-11 ligand PET/CT depends on the serum PSA-value in patients with biochemical recurrence of prostate cancer**

### **SUPPLEMENTARY MATERIALS**

**Supplementary Table 1: Location of PC recurrence with respect to PSA, PSAdt and PSAvel.** See Supplementary Table 1
